# Supplementary material
Source: publisher figshare collection journal article supplement (https://acs.figshare.com/ndownloader/files/14000672)
Supplement: Supplementary file 1 [file 14000672]

## Supporting Information

### Highly Ordered 3D Microstructure-Based Electronic Skin Capable of Differentiating Pressure, Temperature, and Proximity

Jin-Oh Kim,<sup>†,#</sup> Se Young Kwon,<sup>†,#</sup> Youngsoo Kim,<sup>‡</sup> Han Byul Choi,<sup>†</sup> Jun Chang Yang,<sup>†</sup> Jin-won Oh,<sup>†</sup> Hyeon Seok Lee,<sup>†</sup> Joo Yong Sim,<sup>§</sup> Seunghwa Ryu,<sup>‡</sup> and Steve Park\*,<sup>†</sup>

<sup>†</sup>Department of Materials Science and Engineering, Korea Advanced Institute of Science and Technology (KAIST), Daejeon 34141, Republic of Korea

<sup>‡</sup>Department of Mechanical Engineering, Korea Advanced Institute of Science and Technology (KAIST), Daejeon 34141, Republic of Korea

<sup>§</sup>Bio-Medical IT Convergence Research Department, Electronics and Telecommunications Research Institute (ETRI), Daejeon 34129, Republic of Korea

[#] Equal contribution

[\*] Corresponding Author E-mail: [stevepark@kaist.ac.kr](mailto:stevepark@kaist.ac.kr)

## Table of Contents

- Table S1. Numerical analysis on the capacitive pressure sensing performance.
- Table S2. Numerical analysis on the piezoresistive pressure sensing performance.
- Table S3. Numerical analysis on the piezoresistive temperature sensing performance.
- Figure S1. Pore size distribution from SEM image analysis.
- Figure S2. SEM image of sugar template-based microstructure.
- Figure S3. Limit of detection of the capacitive pressure sensor.
- Figure S4. Photographs of a bare PDMS sample pressed by a 1 mm diameter tip.
- Figure S5. Schematic and optical image of 3 x 3 array device.
- Figure S6. Cyclic stability of a 500  $\mu\text{m}$  microporous capacitive sensor under repeated loading and unloading of pressure for 1000 cycles.
- Figure S7. Response time of a 500  $\mu\text{m}$  pore capacitive sensor.
- Figure S8. Schematic and optical images of different shapes of 3D microstructured elastomers.
- Figure S9. Simulation of various shapes of 3D microstructured PDMS.
- Figure S10. Schematic and optical image of 3D porous PDMS film detecting human motion
- Figure S11. Optical image of swollen 3D microstructured PDMS in MWCNT solution.
- Figure S12. Limit of detection of the piezoresistive pressure sensor.
- Figure S13. Cyclic stability of a 500  $\mu\text{m}$  microporous piezoresistive sensor under repeated loading and unloading of pressure for 1000 cycles.
- Figure S14. Response time of a 500  $\mu\text{m}$  pore piezoresistive sensor.
- Figure S15. Optical image of an integrated sensor that can distinguish temperature, pressure and proximity.
- Figure S16. Response of a piezoresistive sensor under rapid change in temperature.
- Figure S17. Response of the capacitive and piezoresistive sensor under strain.

| Pressure (kPa)                       | 10      | 20      | 30      | 40      | 50      | 60       | 70       | 80       | 90       | 100      |
|--------------------------------------|---------|---------|---------|---------|---------|----------|----------|----------|----------|----------|
| Average of $\Delta C/C_0$            | 4.36551 | 6.27997 | 7.48006 | 8.51076 | 9.34842 | 10.03049 | 10.58601 | 11.03847 | 11.41225 | 11.71143 |
| Standard deviation of $\Delta C/C_0$ | 0.01324 | 0.00834 | 0.11579 | 0.12065 | 0.12451 | 0.12765  | 0.13021  | 0.13229  | 0.13401  | 0.13538  |
| Coefficient of variation (%)         | 0.3033  | 0.1328  | 1.5480  | 1.4176  | 1.3319  | 1.2726   | 1.2300   | 1.1984   | 1.1743   | 1.1560   |

**Table S1.** Average, standard deviation, and coefficient of variation of the relative change in capacitance ( $\Delta C/C_0$ ) under different static pressure levels (10, 20, 30, 40, 50, 60, 70, 80, 90, 100 kPa).

| Pressure (kPa)                       | 10      | 20      | 30      | 40      | 50       | 60       | 70      | 80       | 90       | 100      |
|--------------------------------------|---------|---------|---------|---------|----------|----------|---------|----------|----------|----------|
| Average of $\Delta G/G_0$            | 3.24045 | 6.20481 | 7.74903 | 9.94411 | 11.42466 | 12.63433 | 13.6423 | 14.27775 | 15.04334 | 15.81872 |
| Standard deviation of $\Delta G/G_0$ | 0.14941 | 0.23088 | 0.30625 | 0.36951 | 0.02125  | 0.2866   | 0.24636 | 0.01622  | 0.20727  | 0.2911   |
| Coefficient of variation (%)         | 4.611   | 3.7210  | 3.9521  | 3.7159  | 0.1860   | 2.2684   | 1.8059  | 0.1136   | 1.3778   | 1.8402   |

**Table S2.** Average, standard deviation, and coefficient of variation of the relative change in conductance ( $\Delta G/G_0$ ) under different static pressure levels (10, 20, 30, 40, 50, 60, 70, 80, 90, 100 kPa).

| Temperature (°C)                     | 30       | 40       | 50       | 60       | 70      |
|--------------------------------------|----------|----------|----------|----------|---------|
| Average of $\Delta R/R_0$            | -0.04639 | -0.10099 | -0.16281 | -0.25529 | -0.3277 |
| Standard deviation of $\Delta R/R_0$ | 0.00199  | 0.01174  | 0.01196  | 0.01006  | 0.01739 |
| Coefficient of variation (%)         | 4.2897   | 11.6250  | 7.3460   | 3.9406   | 5.3067  |

**Table S3.** Average, standard deviation, and coefficient of variation of the relative resistance change ( $\Delta R/R_0$ ) under various temperatures (30, 40, 50, 60, 70 °C).

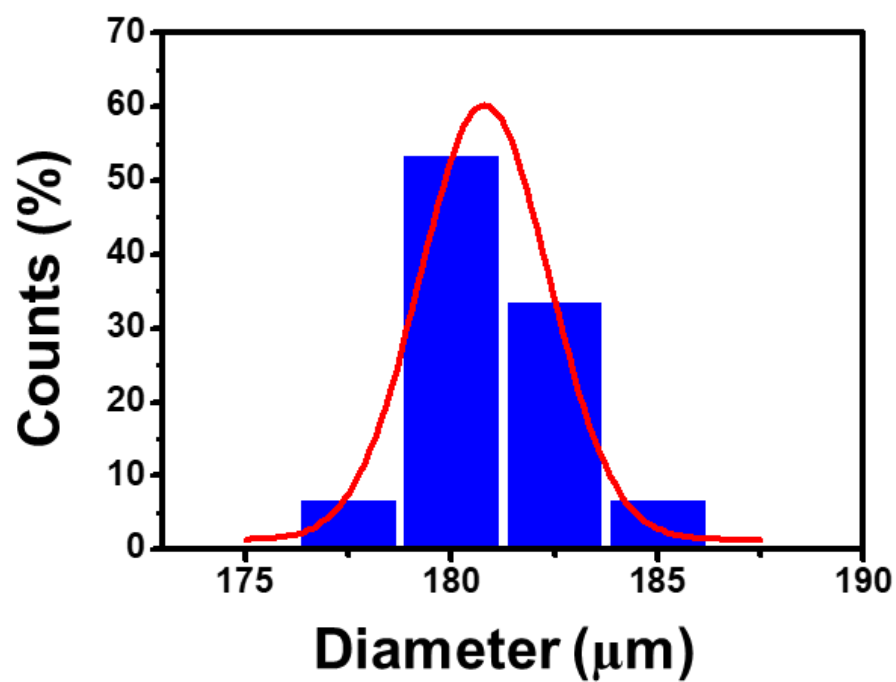

**Figure S1.** Pore size distribution from SEM image analysis. Mean diameter and standard deviation of the pores were 179.4831 μm and 1.7611 μm, respectively.

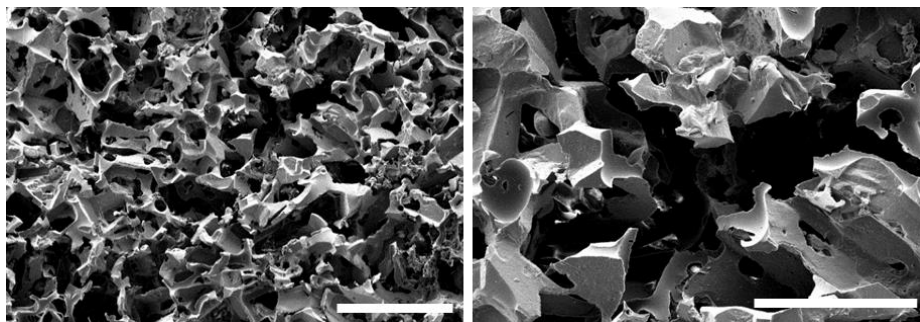

**Figure S2.** SEM image of sugar template-based microstructure. Scale bar, 1 mm (left) and 500  $\mu\text{m}$  (right).

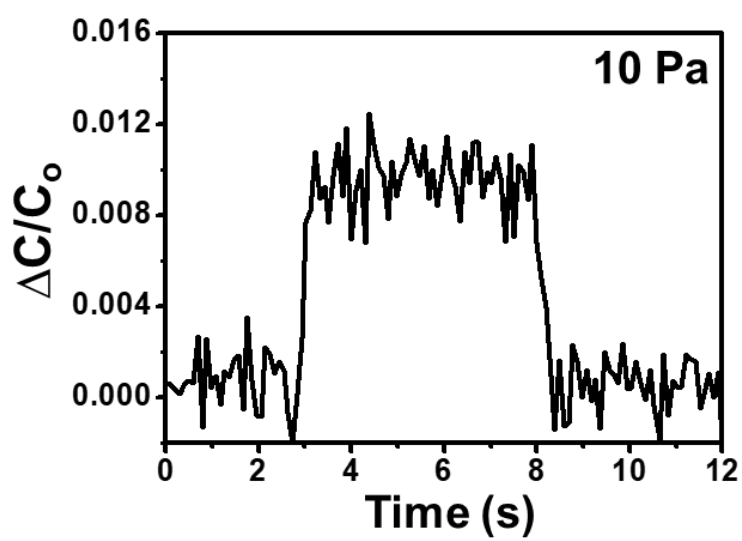

**Figure S3.** Relative change in capacitance versus time graph with an applied pressure of 10 Pa.



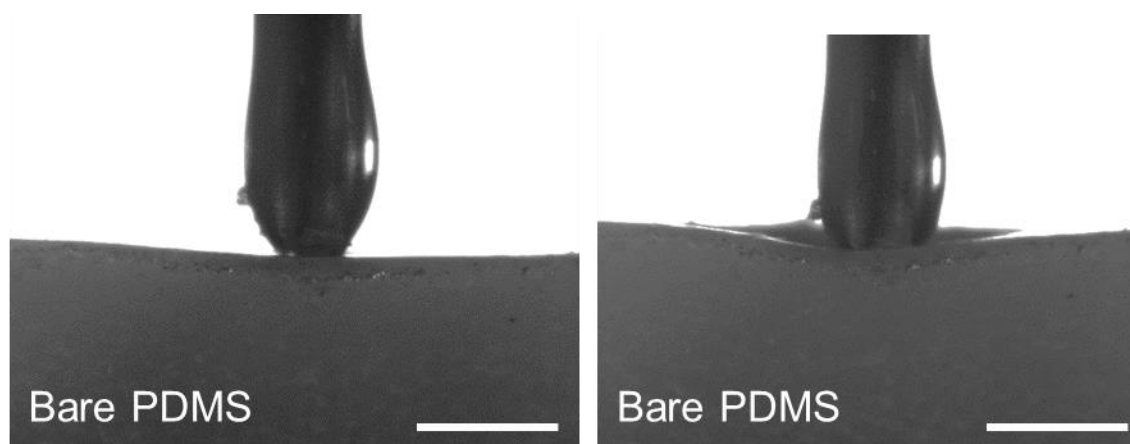

**Figure S4.** Photographs of a bare PDMS sample pressed by a 1 mm diameter tip under different compressive strains: 0 % (left), 50 % (right). Scale bar, 1 mm.

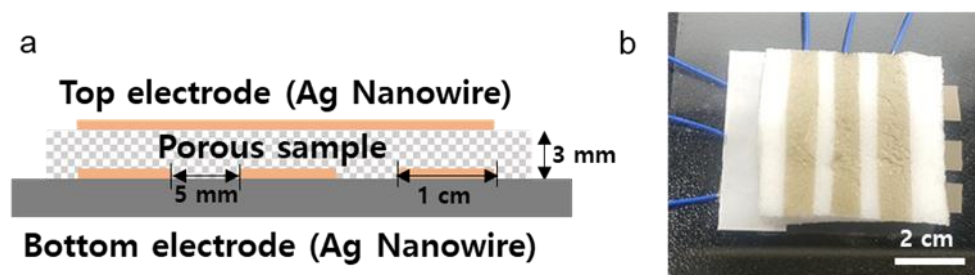

**Figure S5.** a) Schematic and b) optical image of 3 x 3 array device.

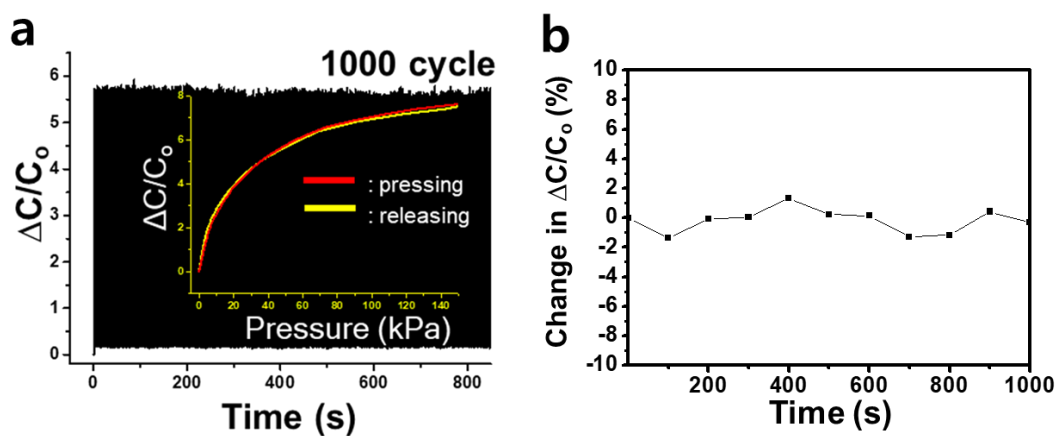

**Figure S6.** a) Relative capacitance change curve of a 500  $\mu\text{m}$  pore sample under repeated loading and unloading of 70 kPa of pressure for 1000 cycles. The inset is the plot of relative change in capacitance versus pressure under loading and unloading. b) Percentage change in relative capacitance (change in output signal divided by original output signal before cycling) with 1000 cycles.

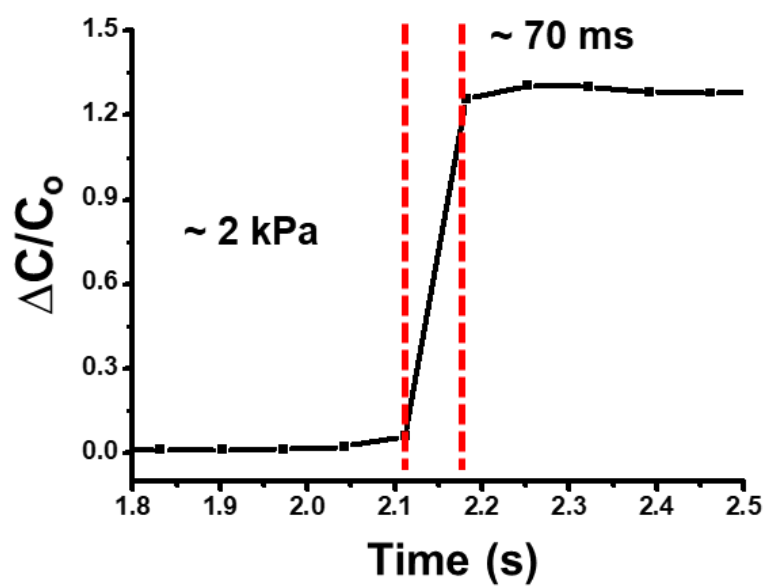

**Figure S7.** Response time of a 500  $\mu\text{m}$  microporous capacitive sensor upon the loading of 2 kPa of pressure.

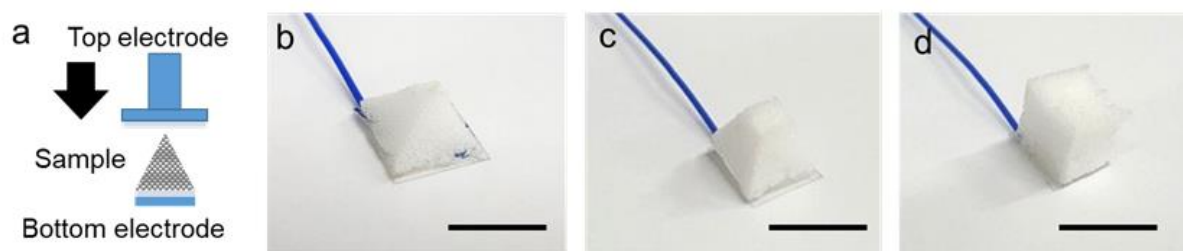

**Figure S8.** a) Schematic and optical images of different shapes of 3D microstructured elasto-mers: b) pyramid, c) square horn, d) cuboid. Scale bar, 5 mm.

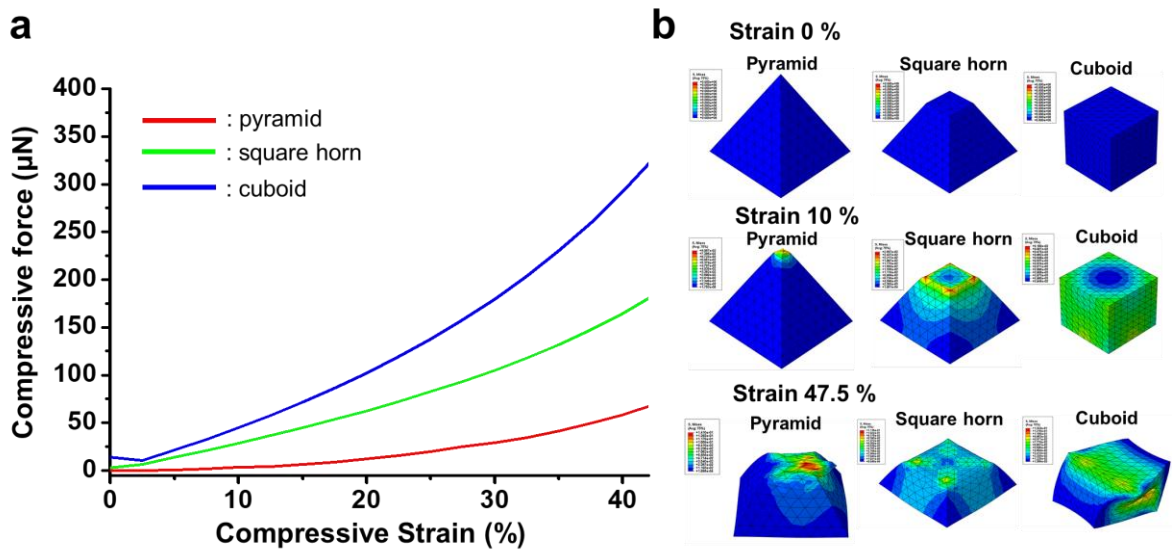

**Figure S9.** Simulated data of structural effect on the mechanical properties and stress distribution. a) Simulation of compressive force versus compressive strain curves for the differently shaped microstructured samples. b) Simulated images of stress distribution on each sample, under different compressive strains: 0 %, 10 %, and 47.5 %.

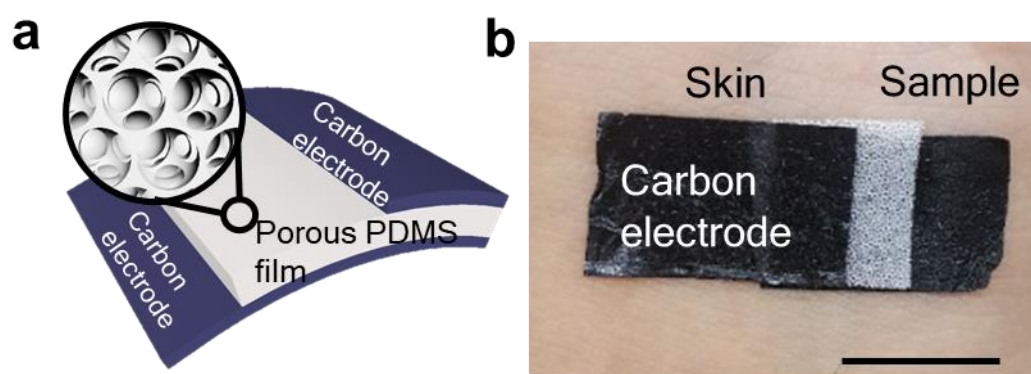

**Figure S10.** a) Schematic and b) optical image of 3D porous PDMS thin film combined with adhesive carbon electrode. Scale bar, 1 cm.

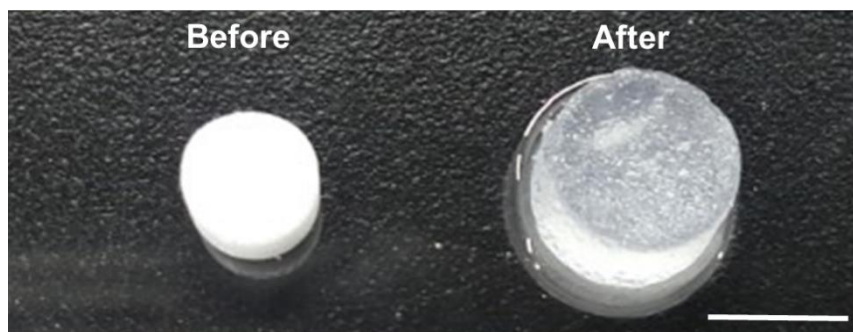

**Figure S11.** Optical image of microstructured PDMS: before (left) after (right) being swollen by toluene. Scale bar, 1 cm.



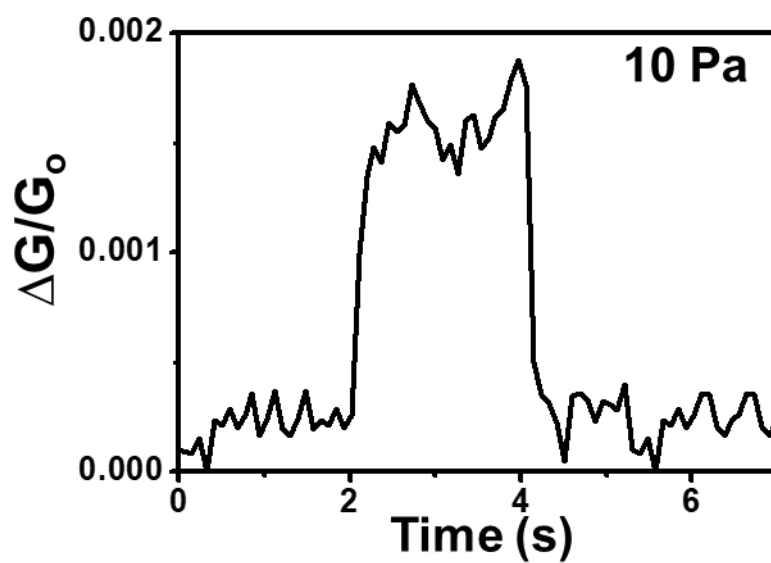

**Figure S12.** Relative change in conductance versus time graph with an applied pressure of 10 Pa.

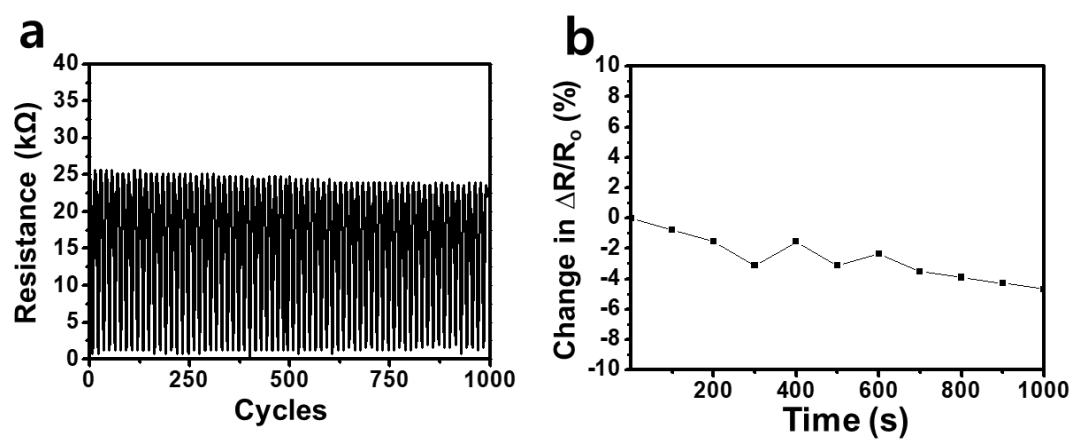

**Figure S13.** a) Resistance change curve of a 500  $\mu\text{m}$  pore sample under repeated loading and unloading of 70 kPa of pressure for 1000 cycles. b) Percentage change in relative resistance (change in output signal divided by original output signal before cycling) with 1000 cycles.

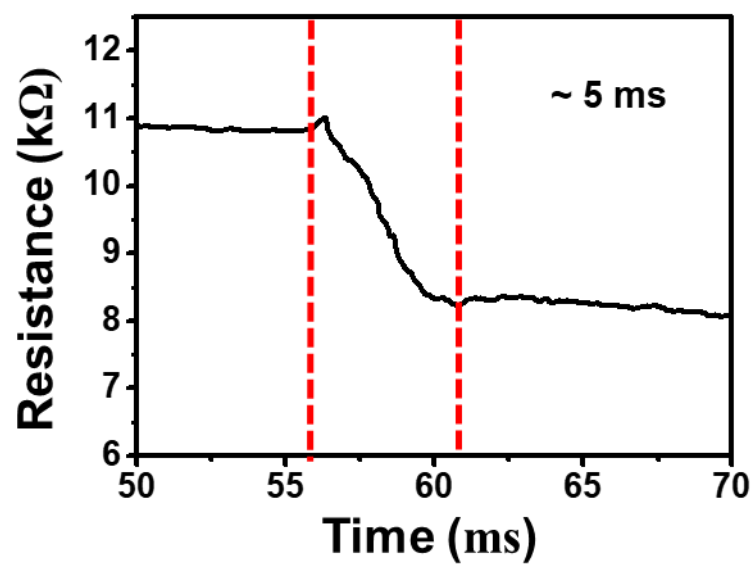

**Figure S14.** Response time of a 500  $\mu\text{m}$  microporous piezoresistive sensor upon the rapid loading of pressure.

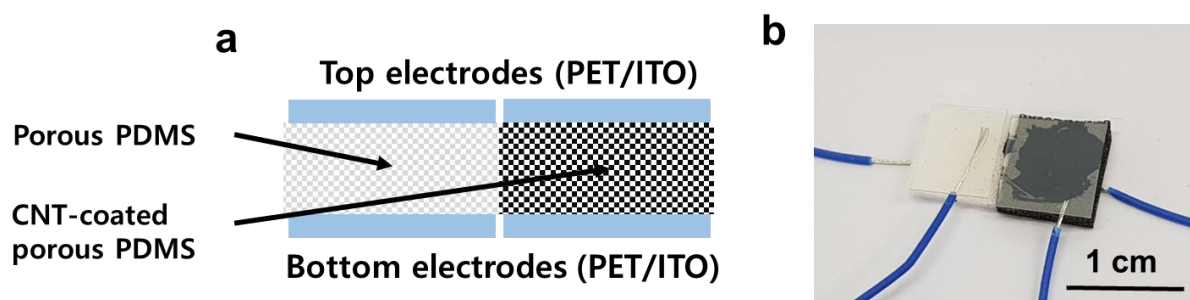

**Figure S15.** a) Schematic and b) optical image of combined sensor distinguishing temperature, pressure and proximity. Scale bar, 1 cm.

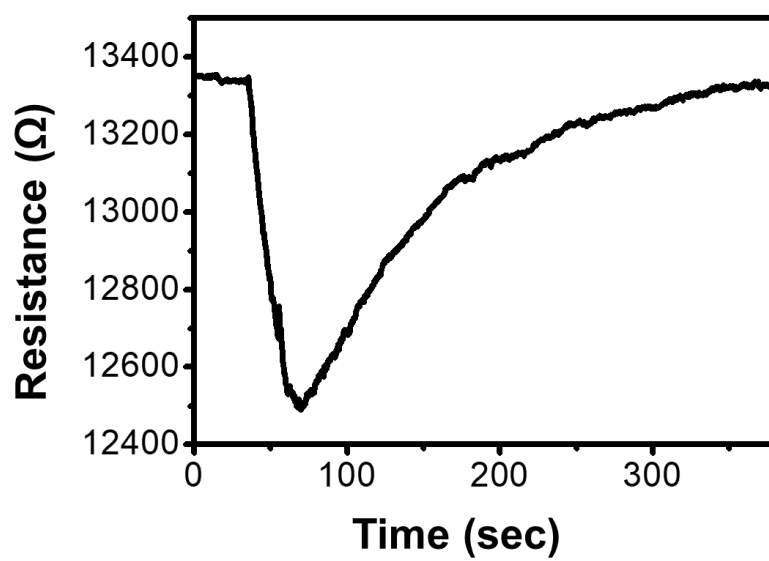

**Figure S16.** Resistance versus time plot under sudden change in temperature.

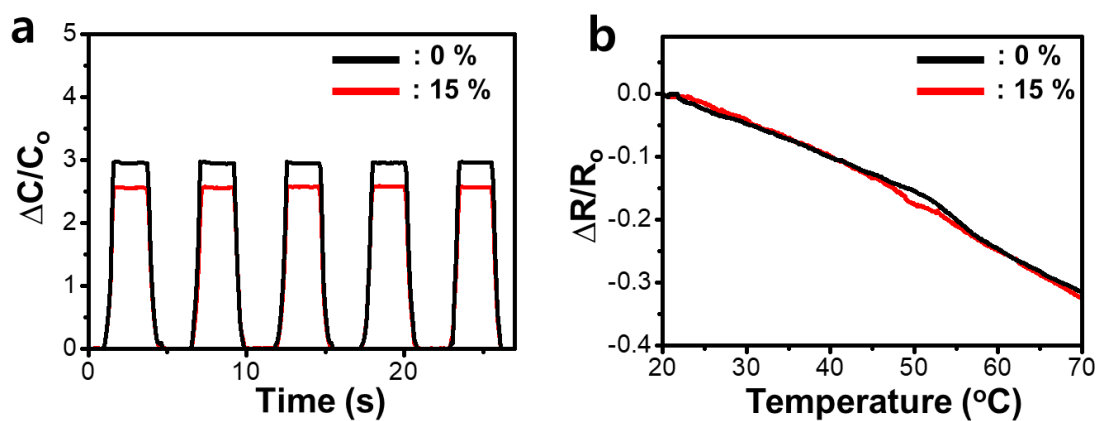

**Figure S17.** Response of sensor under strain. a) Relative capacitance change versus time plots of our capacitive sensor under a repeated pressure of 15 kPa under 0 and 15 % strain. b) Relative resistance change due to temperature of our piezoresistive sensor under 0 and 15 % of strain.
